# Supplementary material for: Tensile Yield Strain of Human Cortical Bone from the Femoral Diaphysis Is Constant among Healthy Adults and across the Anatomical Quadrants
Source: MDPI journal article supplement (doi:10.3390/bioengineering11040395), 2024-04-19
Supplement: s1 [file s1]

## Supplementary materials

### *Calculation of mechanical parameters*

The load cell and the two extensometers measured the load applied to the cortical bone specimen and the elongation of the narrow section. The stress ( $\sigma$ ) was calculated using the Equation S1:

$$\sigma = F/A \quad (S1)$$

where  $F$  is the force acting on the specimen and  $A$  is the cross-sectional area of the narrow part of the specimen. The strain ( $\epsilon$ ) was calculated using the Equation S2:

$$\epsilon = \Delta L/L_0 \quad (S2)$$

where  $\Delta L$  is the average of the elongation measured simultaneously by the two extensometers when the force  $F$  is acting on the cortical bone specimen and  $L_0$  initial gauge length measured with a preload of 10N.

The stress-strain curve is shown in Figure S1 (black line). The regression line fitting the linear part of the stress-strain curve is shown in the figure (red line). A second line is drawn parallel to the regression line, offset by 0.2%. The intersection of this second line (blue line) with the stress-strain curve identifies the yield point. The coordinates of the yield point are the yield strain and the yield stress.

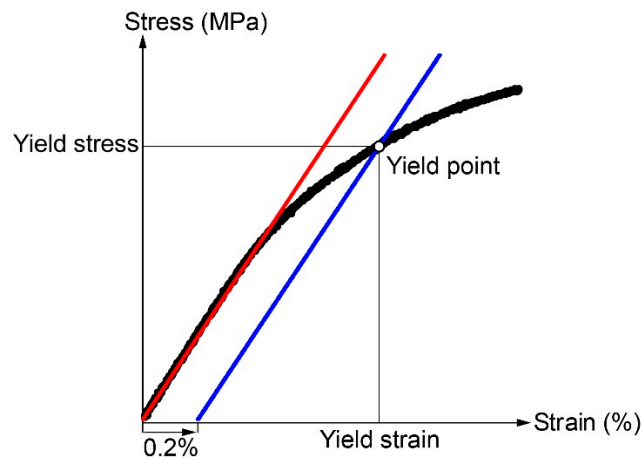

Figure S1. The 0.2% offset method. The stress-strain curve (black curve) from which the elastic modulus, yield stress and yield strain mechanical parameters are derived.

### Stress-strain curves

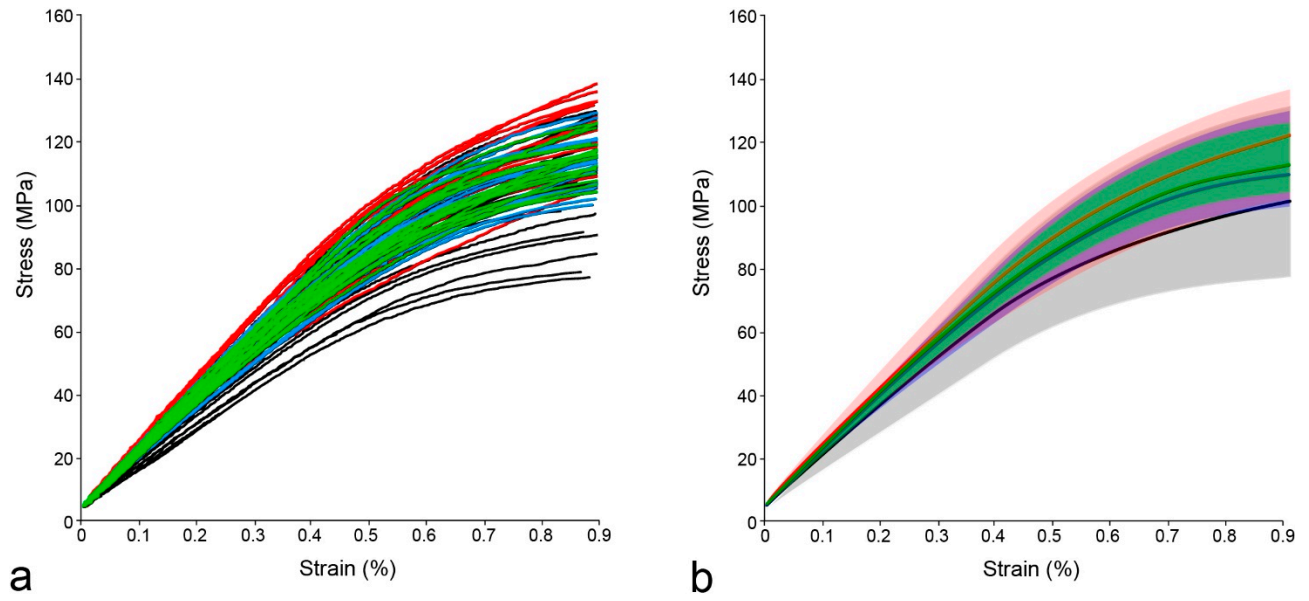

Figure S2. Aggregated stress-strain curves. (a) All the stress-strain curves calculated from the experimental data collected testing for all 80 specimens. (b) The average stress-strain curve, with the minimum-maximum band depicted around each curve, calculated for each quadrant. (Red colour = anterior quadrant; Cyan colour = lateral quadrant; Black colour = posterior quadrant; Green colour = medial quadrant). Note: the x-axis was limited to 0.9% strain to focus on the elastic regime.
