# Supplementary material for: Tensile Yield Strain of Human Cortical Bone from the Femoral Diaphysis Is Constant among Healthy Adults and across the Anatomical Quadrants
Source: Bioengineering (Basel). 2024 Apr 19;11(4):395. doi: 10.3390/bioengineering11040395 (PMC11048186; doi:10.3390/bioengineering11040395)
Supplement: Supplementary file 1 [file bioengineering-11-00395-s001.zip]

Archive with 4 entries (4 files):
- Baleani - Suplementary materials.pdf
- FigureS1.jpg
- FigureS2.jpg
- Table S1. Raw data.txt
