# Supplementary material for: Tensile Yield Strain of Human Cortical Bone from the Femoral Diaphysis Is Constant among Healthy Adults and across the Anatomical Quadrants
Source: Bioengineering (Basel). 2024 Apr 19;11(4):395. doi: 10.3390/bioengineering11040395 (PMC11048186; doi:10.3390/bioengineering11040395)
Supplement: Supplementary file 1 [file bioengineering-11-00395-s001.zip › Table S1. Raw data.txt]

Donor	Quadrant	E(MPa)	Ystrain(%)	Ystress(MPa)
Donor1	Anterior	19.1	0.801	119.6
Donor1	Anterior	18.9	0.842	124.8
Donor1	Anterior	19.6	0.863	130.1
Donor1	Anterior	19.9	0.811	128.5
Donor1	Medial	19.3	0.788	116.9
Donor1	Medial	18.5	0.792	113.3
Donor1	Medial	18.9	0.825	117.2
Donor1	Medial	18.5	0.860	125.0
Donor1	Posterior	17.3	0.843	114.0
Donor1	Posterior	17.6	0.815	104.3
Donor1	Posterior	19.3	0.809	121.0
Donor1	Posterior	19.0	0.824	122.3
Donor1	Lateral	17.7	0.855	119.6
Donor1	Lateral	18.7	0.859	128.0
Donor1	Lateral	18.4	0.860	126.3
Donor1	Lateral	16.6	0.862	112.8
Donor2	Anterior	20.0	0.838	130.6
Donor2	Anterior	20.1	0.861	136.6
Donor2	Anterior	20.5	0.831	133.1
Donor2	Anterior	18.5	0.854	124.0
Donor2	Medial	18.1	0.859	122.4
Donor2	Medial	18.2	0.858	123.1
Donor2	Medial	17.7	0.821	113.0
Donor2	Medial	17.2	0.842	113.9
Donor2	Posterior	15.5	0.786	93.6
Donor2	Posterior	19.2	0.813	123.3
Donor2	Posterior	17.5	0.834	116.4
Donor2	Posterior	19.0	0.862	129.0
Donor2	Lateral	16.8	0.842	112.0
Donor2	Lateral	16.7	0.815	106.2
Donor2	Lateral	16.6	0.840	108.7
Donor2	Lateral	16.3	0.815	103.2
Donor3	Anterior	17.5	0.850	117.4
Donor3	Anterior	16.5	0.828	108.0
Donor3	Anterior	17.1	0.802	106.7
Donor3	Anterior	15.2	0.841	102.6
Donor3	Medial	17.1	0.857	115.3
Donor3	Medial	16.3	0.843	108.6
Donor3	Medial	17.3	0.828	111.9
Donor3	Medial	16.9	0.841	110.5
Donor3	Posterior	12.7	0.771	77.6
Donor3	Posterior	13.2	0.793	81.6
Donor3	Posterior	16.3	0.820	104.6
Donor3	Posterior	15.5	0.865	106.9
Donor3	Lateral	16.8	0.863	114.7
Donor3	Lateral	18.3	0.836	119.4
Donor3	Lateral	16.7	0.857	112.6
Donor3	Lateral	16.6	0.802	103.6
Donor4	Anterior	18.7	0.801	117.2
Donor4	Anterior	18.7	0.822	122.7
Donor4	Anterior	18.9	0.840	124.7
Donor4	Anterior	17.9	0.833	118.1
Donor4	Medial	16.5	0.854	110.8
Donor4	Medial	16.3	0.860	110.7
Donor4	Medial	16.4	0.794	101.8
Donor4	Medial	16.1	0.835	105.9
Donor4	Posterior	12.3	0.794	75.9
Donor4	Posterior	12.2	0.806	76.1
Donor4	Posterior	14.8	0.803	89.1
Donor4	Posterior	17.0	0.812	108.4
Donor4	Lateral	17.2	0.813	108.9
Donor4	Lateral	18.8	0.804	118.0
Donor4	Lateral	18.1	0.799	112.4
Donor4	Lateral	17.5	0.798	108.8
Donor5	Anterior	16.7	0.865	114.5
Donor5	Anterior	16.7	0.861	115.3
Donor5	Anterior	17.6	0.783	108.9
Donor5	Anterior	18.0	0.836	118.4
Donor5	Medial	16.2	0.847	108.7
Donor5	Medial	17.8	0.831	114.9
Donor5	Medial	15.9	0.829	103.9
Donor5	Medial	16.0	0.824	102.5
Donor5	Posterior	16.8	0.821	108.4
Donor5	Posterior	16.2	0.851	108.8
Donor5	Posterior	16.2	0.785	97.6
Donor5	Posterior	14.2	0.780	87.9
Donor5	Lateral	14.7	0.856	99.5
Donor5	Lateral	15.1	0.849	101.1
Donor5	Lateral	16.0	0.823	103.4
Donor5	Lateral	15.7	0.844	103.9
